# Supplementary material for: Tocopherol attenuates the oxidative stress of BMSCs by inhibiting ferroptosis through the PI3k/AKT/mTOR pathway
Source: PubMed Central journal article supplement (PMC9428255; doi:10.3389/fbioe.2022.938520), 2022-08-17
Supplement: Image1.pdf [file Image1.pdf]

## Supplementary Figure

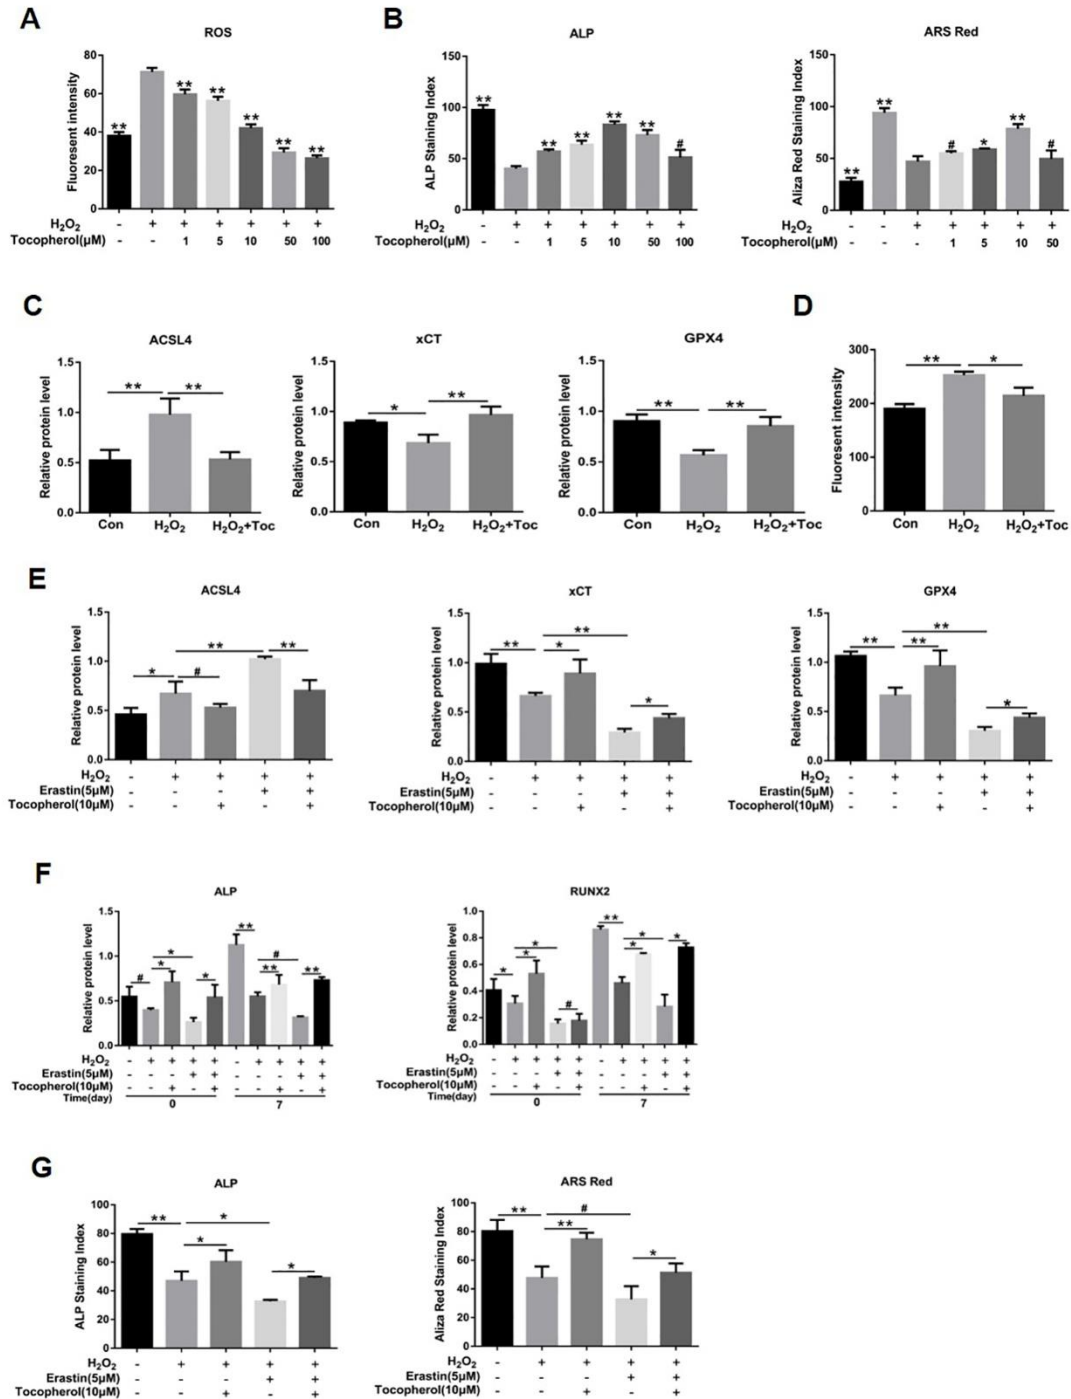

**FIGURE S1** (A) Quantitative analysis of Intracellular ROS level of H<sub>2</sub>O<sub>2</sub> stimulated BMSCs. (B) Quantitative analysis of ALP staining and Alizarin red staining. (C) Quantitative analysis of ferroptosis-related protein (ACSL4, xCT and GPX4) levels. (D) Quantitative analysis of the level of Fe<sup>2+</sup> in the mitochondria. (E) Adding the ferroptosis activator Erastin (5 μM) combined with H<sub>2</sub>O<sub>2</sub> and Tocopherol, the Quantitative analysis of ACSL4, xCT and GPX4 protein level. (F)

Quantitative analysis of osteogenesis-associated proteins ALP and RUNX2. (G) Adding the ferroptosis activator Erastin (5  $\mu$ M) combined with H<sub>2</sub>O<sub>2</sub> and Tocopherol, the Quantitative analysis of ALP staining and Alizarin red staining. (\* $p$ <0.05,\*\* $p$ <0.01 vs. H<sub>2</sub>O<sub>2</sub> group)

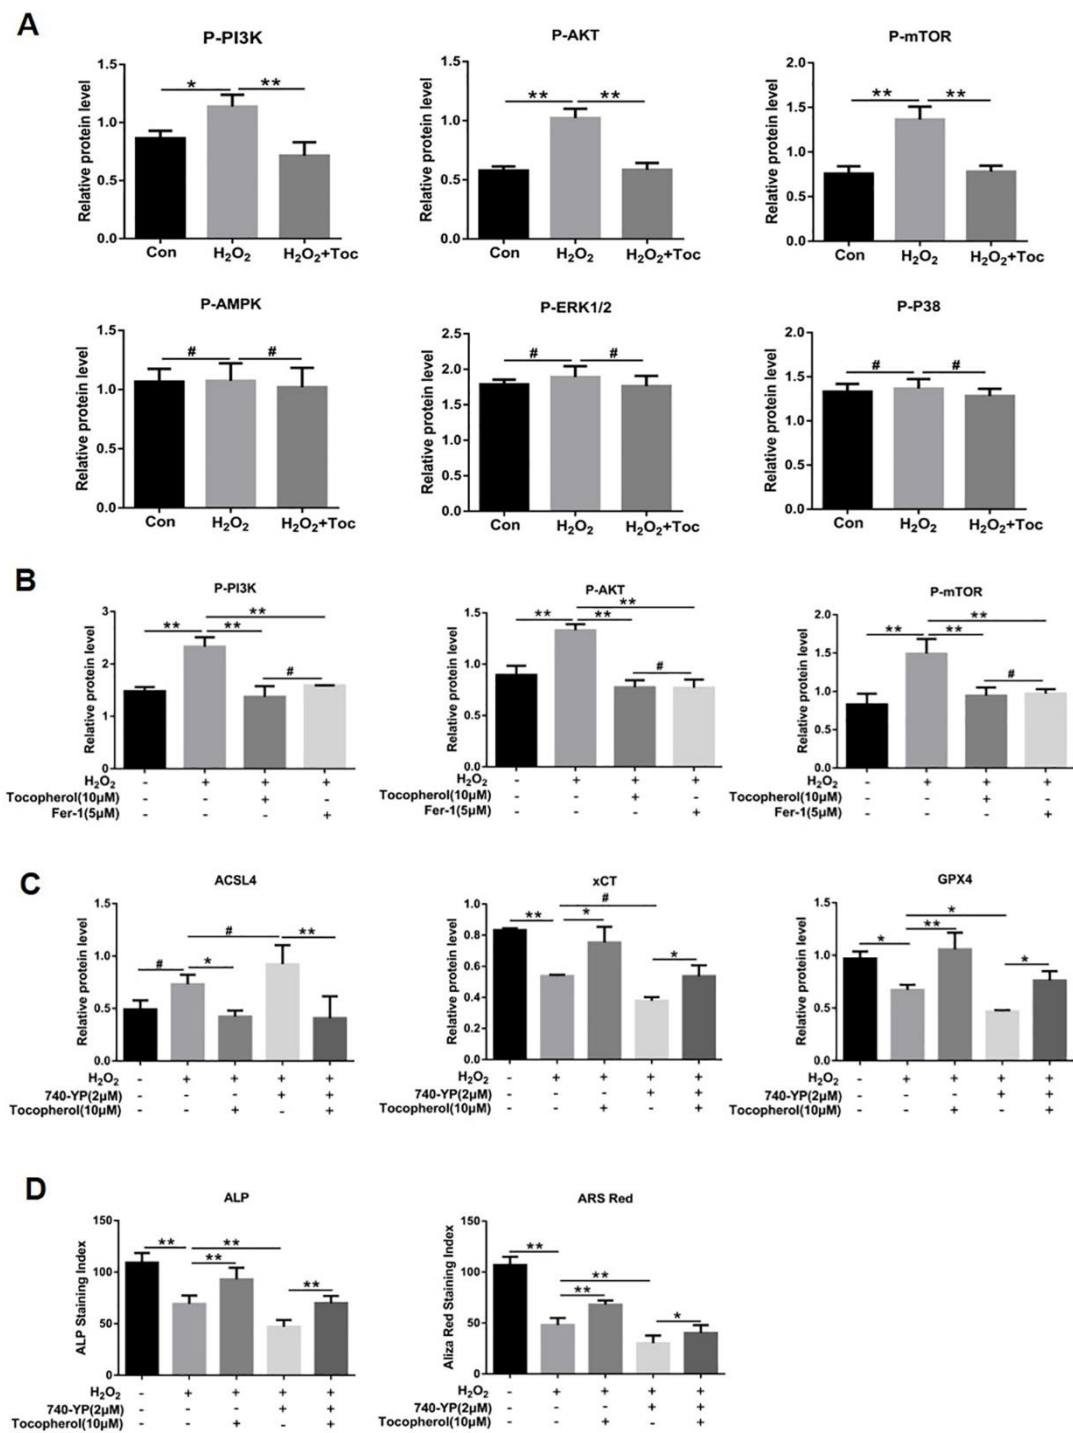

**FIGURE S2** (A) Quantitative analysis of PI3K/AKT/mTOR, AMPK, MAPK (P38 and ERK1/2)-related protein levels. (B) Adding the ferroptosis inhibitor ferrostatin-1 (5  $\mu$ M), the Quantitative analysis of PI3K/AKT/mTOR related protein levels. (C) Adding the the PI3K

agonist 740-YP (2  $\mu$ M) combined with H<sub>2</sub>O<sub>2</sub> and Tocopherol, the Quantitative analysis of ACSL4, xCT and GPX4 protein level. (D) Adding the the PI3K agonist 740-YP (2  $\mu$ M) combined with H<sub>2</sub>O<sub>2</sub> and Tocopherol, the Quantitative analysis of ALP staining and Alizarin red staining. (\*p<0.05,\*\*p<0.01 vs. H<sub>2</sub>O<sub>2</sub> group)
